# Supplementary material
Source: PubMed Central journal article supplement (PMC7656920)
Supplement: advancesADV2020003092-suppl1.pdf [file advancesADV2020003092-suppl1.pdf]

## **Real-World Evidence of Tisagenlecleucel for pediatric acute lymphoblastic leukemia and Non-Hodgkin Lymphoma**

### **Supplemental Materials:**

**Figure S1:** Summary of release specifications (Manufacturing Infused Set). Boxplots illustrating the distribution of (A) dose and (B) cell viability for both indications in the registry vs. pivotal trials. (C) Summary of out-of-specification batches captured in the registry.

**Table S1:** Detailed demographic / baseline information and subgroups for ALL (A) and NHL (B) comparing to ELIANA and JULIET clinical trials.

**Table S2:** Safety and efficacy analyses for unique subgroups within recipients with ALL (A) and NHL (B)

**Table S3:** Overview of safety endpoints other than CRS and ICANS

**Table S1:** Detailed demographic / baseline information and subgroups for ALL (A) and NHL (B) comparing to ELIANA and JULIET clinical trials. (Infused Set)

| <b>A</b>                                                                                      | <b>CIBMTR; ALL<br/>(N=255), n (%)</b> | <b>ELIANA<br/>(N=79), n (%)</b>  |
|-----------------------------------------------------------------------------------------------|---------------------------------------|----------------------------------|
| Median age at infusion, years (range)                                                         | 13.2 (0.41-26.17)                     | 11.0 (3-24)                      |
| Age <3 years                                                                                  | 15 (5.9)                              | 0                                |
| Gender, male / female                                                                         | 150 (58.8) / 105<br>(41.2)            | 45 (57.0) /<br>34 (43.0)         |
| Down Syndrome                                                                                 | 12 (4.7)                              | 6 (7.6)                          |
| Prior CNS involvement                                                                         | 24 (9.4)                              | 11 (13.9)                        |
| Disease status at time of cellular therapy infusion (or at enrollment in clinical trial):     |                                       |                                  |
| Primary refractory/Relapsed                                                                   | 159 (62.3)                            | 79 (100)                         |
| CR                                                                                            | 95 (37.2)                             | 0                                |
| Unknown                                                                                       | 1 (0.5)                               | 0                                |
| MRD negative prior to infusion                                                                | 44 (17.3)                             | NA                               |
| Median number of prior therapies (range)                                                      | 3 (0-15)                              | 3 (1-8)                          |
| Prior blinatumomab                                                                            | 38 (14.9)                             | 0                                |
| Prior inotuzumab                                                                              | 27 (10.6)                             | 3 (3.8)                          |
| Prior HCT:                                                                                    |                                       |                                  |
| Allogeneic                                                                                    | 71 (27.8)                             | 48 (60.8)                        |
| Autologous                                                                                    | 1 (0.4)                               | 0                                |
| Both                                                                                          | 1 (0.4)                               | 0                                |
| Karnofsky/Lansky performance status prior to cellular therapy:                                |                                       |                                  |
| 90-100                                                                                        | 174 (68.2)                            | 53 (67.1)                        |
| 80                                                                                            | 37 (14.5)                             | 13 (16.5)                        |
| <80                                                                                           | 31 (12.2)                             | 13 (16.5)                        |
| Not reported                                                                                  | 13 (5.1)                              | -                                |
| Median time from leukapheresis acceptance (or enrollment in clinical trial) to infusion, days | 33 (21-91)                            | 46                               |
| Median time of follow-up since infusion, months                                               | 13.4 (3.5-27.9)                       | 38.8 (19.1-49.7)                 |
| <b>B</b>                                                                                      |                                       |                                  |
|                                                                                               | <b>CIBMTR; NHL<br/>(N=155), n (%)</b> | <b>JULIET<br/>(N=115), n (%)</b> |
| Median age at infusion, years (range)                                                         | 65.4 (18.45-88.99)                    | 56.0 (22.0-76.0)                 |
| Age ≥ 65 years                                                                                | 83 (53.3)                             | 26 (22.6)                        |
| Gender, male / female                                                                         | 91 (53.5) / 64 (41.3)                 | 71 (61.7) /<br>44 (38.3)         |
| Double/triple hit                                                                             | 17 (11)                               | 20 (17.4)                        |
| Disease status at time of cellular therapy infusion (or at enrollment in clinical trial):     |                                       |                                  |
| Primary refractory/Relapsed                                                                   | 147 (94.8)                            | 115 (100)                        |
| CR                                                                                            | 7 (4.5)                               | 0                                |
| Unknown                                                                                       | 1 (0.7)                               | 0                                |
| Median number of prior therapies (range)                                                      | 4 (0-11)                              | 3 (1-6)                          |
| Prior HCT:                                                                                    |                                       |                                  |
| Allogeneic                                                                                    | 5 (3.2)                               | 0                                |
| Autologous                                                                                    | 40 (25.8)                             | 56 (48.7)                        |
| Both                                                                                          | 1 (0.6)                               | 0                                |
| ECOG performance status prior to cellular therapy:                                            |                                       |                                  |
| 0-1                                                                                           | 129 (83.2)                            | 115 (100)                        |
| 2-4                                                                                           | 8 (5.2)                               | 0                                |
| Not reported                                                                                  | 18 (11.6)                             | 0                                |
| Median time from leukapheresis acceptance (or enrollment in clinical trial) to infusion, days | 31.5 (22-130)                         | 54                               |
| Median time of follow-up since infusion, months                                               | 11.9 (3.8-19.0)                       | 32.6 (16.3-44.9)                 |

**Table S2:** Safety and efficacy analyses for unique subgroups within recipients with ALL (A) and NHL (B)

**A**

| Group                           | N=410            | BOR of CR<br>% (95% CI)      | 6-mo DOR<br>% (95% CI)       | 6-mo OS<br>% (95% CI)        | CRS Gr. ≥3<br>% (95% CI)     | ICANS Gr. ≥3<br>% (95% CI) |
|---------------------------------|------------------|------------------------------|------------------------------|------------------------------|------------------------------|----------------------------|
| <b>Overall</b>                  | <b>N=249/255</b> | <b>85.5%</b><br>(80.6, 89.7) | <b>78.1%</b><br>(70.5, 84.0) | <b>88.5%</b><br>(83.6, 92.0) | <b>16.1%</b><br>(11.8, 21.2) | <b>9.0%</b><br>(5.8, 13.2) |
| <3 years                        | N=15/15          | 86.7%<br>(59.5, 98.3)        | *                            | *                            | 6.7%<br>(0.2, 31.9)          | 13.3%<br>(1.7, 40.5)       |
| Down's                          | N=12/12          | 100.0%<br>(73.5, 100.0)      | *                            | 100.0%<br>(NE, NE)           | 16.7%<br>(2.1, 48.4)         | 16.7%<br>(2.1, 48.4)       |
| Prior CNS involvement           | N=23/24          | 82.6%<br>(61.2, 95.0)        | *                            | 79.7%<br>(54.1, 92.0)        | 25.0%<br>(9.8, 46.7)         | 8.3%<br>(1.0, 27.0)        |
| Prior blinatumomab <sup>1</sup> | N=37/38          | 78.4%<br>(61.8, 90.2)        | 67.2%<br>(42.5, 83.1)        | 88.5%<br>(72.1, 95.5)        | 13.2%<br>(4.4, 28.1)         | 7.9%<br>(1.7, 21.4)        |
| Prior inotuzumab <sup>1</sup>   | N=26/27          | 65.4%<br>(44.3, 82.8)        | *                            | 64.2%<br>(42.5, 79.5)        | 7.4%<br>(0.9, 24.3)          | 11.1%<br>(2.4, 29.2)       |
| Primary refractory              | N=37/38          | 86.5%<br>(71.2, 95.5)        | *                            | 87.8%<br>(70.5, 95.3)        | 10.5%<br>(2.9, 24.8)         | 7.9%<br>(1.7, 21.4)        |
| MRD negative                    | N=42/44          | 97.6%<br>(87.4, 99.9)        | 85.9%<br>(69.2, 93.9)        | 97.1%<br>(81.4, 99.6)        | 0.0%<br>(0.0, 8.0)           | 2.3%<br>(0.1, 12.0)        |

\*Number of patients at risk is <10 patients <sup>1</sup>Among 37 patients who received blinatumomab prior to tisagenlecleucel, 17 (45.9%) patients experienced treatment failure, relapse, and/or death due to primary disease (median follow up 10.9 months). Among 26 patients who received inotuzomab, 16 (61.5%) experienced treatment failure, relapse, and/or death due to primary disease (median follow up 10.9 months).

**B**

| Group             | N=410            | ORR / BOR of CR<br>% (95% CI)                      | 3-mo DOR<br>% (95% CI)       | 6-mo OS<br>(95% CI)          | CRS Gr. ≥3<br>% (95% CI)  | ICANS Gr. ≥3<br>% (95% CI) |
|-------------------|------------------|----------------------------------------------------|------------------------------|------------------------------|---------------------------|----------------------------|
| <b>Overall</b>    | <b>N=152/155</b> | <b>61.8% (53.6, 69.6) /<br/>39.5% (31.6, 47.7)</b> | <b>70.4%</b><br>(58.8, 79.3) | <b>70.7%</b><br>(62.2, 77.6) | <b>4.5%</b><br>(1.8, 9.1) | <b>5.2%</b><br>(2.3, 9.9)  |
| Double/triple hit | N=17/17          | 70.6% (44.0, 89.7) /<br>47.1% (23.0, 72.2)         | *                            | *                            | 0.0%<br>(0.0, 19.5)       | 5.9%<br>(0.1, 28.7)        |
| <65 years         | N=71/72          | 62.0% (49.7, 73.2) /<br>39.4% (28.0, 51.7)         | 64.4%<br>(46.6, 76.6)        | 76.9%<br>(65.0, 85.2)        | 4.2%<br>(0.9, 11.7)       | 5.6%<br>(1.5, 13.6)        |
| ≥65 years         | N=81/83          | 61.7% (50.3, 72.3) /<br>39.5% (28.8, 51.0)         | 76.1%<br>(60.0, 86.4)        | 64.3%<br>(51.4, 74.6)        | 4.8%<br>(1.3, 11.9)       | 4.8%<br>(1.3, 11.9)        |

\*number of patients at risk is <10 patients

**Table S3:** Overview of safety endpoints other than CRS and ICANS (Safety Set)

|                                   | <b>ALL (N=255), n (%)</b> | <b>NHL (N=155), n(%)</b> |
|-----------------------------------|---------------------------|--------------------------|
| Hypogammaglobulinemia             | 134 (52.5)                | 56 (36.1)                |
| Treated with IVIG                 | 124 (48.6)                | 26 (16.8)                |
| Prolonged cytopenia               | 71 (27.8)                 | 23 (14.8)                |
| Neutropenia                       | 55 (21.6)                 | 8 (5.2)                  |
| Thrombocytopenia                  | 46 (18)                   | 20 (12.9)                |
| Clinically significant infections | 118 (46.3)                | 39 (25.2)                |
| Bacterial                         | 59 (23.1)                 | 18 (11.6)                |
| Viral                             | 57 (22.4)                 | 22 (14.2)                |
| Gr. 3/4 organ toxicities          | 21 (8.2)                  | 3 (1.9)                  |
| Secondary malignancies            | 6 (2.4)                   | 6 (3.9)                  |
| AML                               | 4 (1.6)                   | 0 (0.6)                  |
| MDS                               | 2 (0.8)                   | 1(0.6)                   |
| Other                             | 0                         | 5 (3.2)                  |
| Deaths overall                    | 47 (18.4)                 | 51 (32.9)                |
| Deaths within 30 days of infusion | 8 (3.1)                   | 6 (3.9)                  |
| Progressive disease               | 3 (1.2)                   | 4 (2.6)                  |
| Other                             | 5 (2.0)                   | 2 (1.2)                  |

**Figure S1:** Summary of release specifications (Manufacturing Infused Set): Boxplots illustrating the distribution of dose and cell viability for ALL (A) and NHL (B) in the registry vs. pivotal trials. (C) Summary of out-of-specification batches captured in the registry.

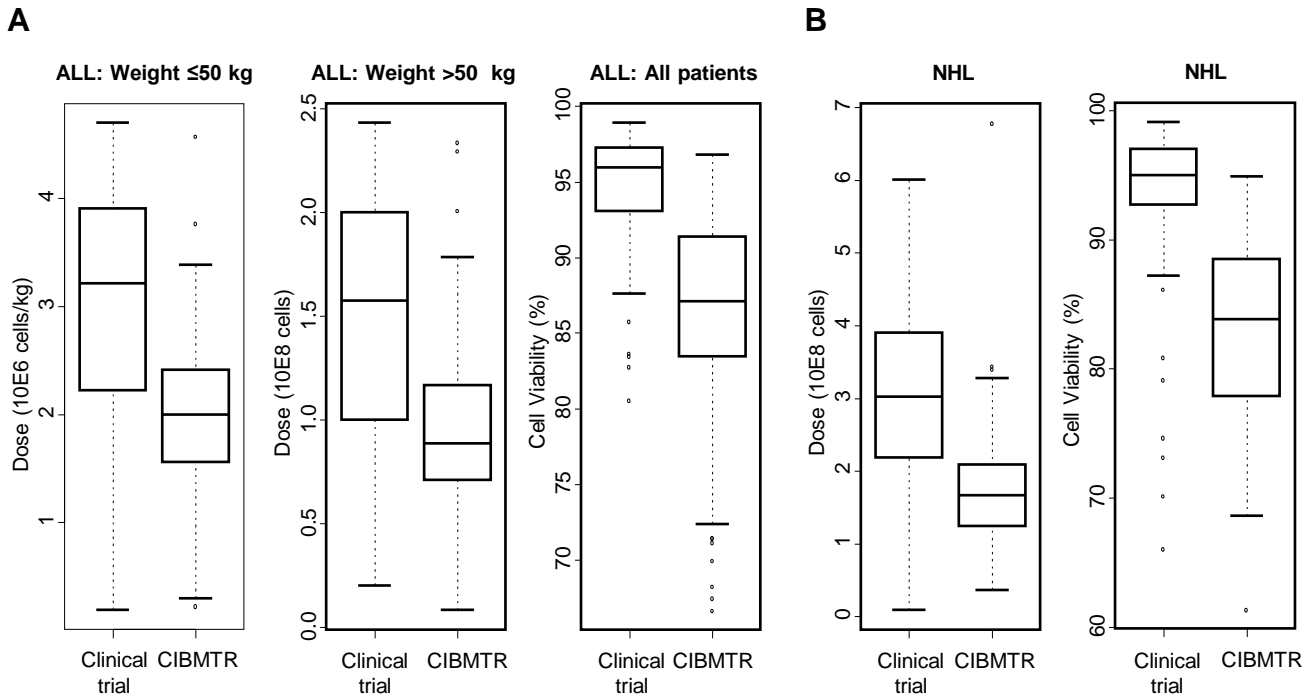

**C**

| OOS specification                              | ALL (N=245), n (%) | NHL (N=138), n (%) | Total (N=383), n (%) |
|------------------------------------------------|--------------------|--------------------|----------------------|
| <b>Any parameter</b>                           | <b>39 (15.9)</b>   | <b>47 (34.1)</b>   | <b>86 (22.5)</b>     |
| Viability (low)                                | 33 (13.5)          | 43 (31.2)          | 76 (19.8)            |
| IFN-gamma release (low or high)                | 4 (1.6)            | 2 (1.4)            | 6 (1.6)              |
| CAR-positive viable T-cells dose (low or high) | 0                  | 3 (2.2)            | 3 (0.8)              |
| CAR expression (low)                           | 3 (1.2)            | 0                  | 3 (0.8)              |
